# Prior Knowledge Biases the Visual Memory of Body Postures

**Qiu Han\***, Marco Gandolfo, Marius V. Peelen

Donders Institute for Brain, Cognition and Behaviour, Radboud University,  
6525 HR, Nijmegen, The Netherlands

\*Correspondence: [qiu.han@donders.ru.nl](mailto:qiu.han@donders.ru.nl)

# 1 **Abstract**

2 Body postures provide information about others' actions, intentions, and emotional states. Little is  
3 known about how postures are represented in the brain's visual system. Considering our extensive  
4 visual and motor experience with body postures, we hypothesized that priors derived from this  
5 experience may systematically bias visual body posture representations. We examined two priors:  
6 gravity and biomechanical constraints. Gravity pushes lifted body parts downwards, while  
7 biomechanical constraints limit the range of possible postures (e.g., an arm raised far behind the head  
8 cannot go down further). Across three experiments (N=246) we probed participants' visual memory  
9 of briefly presented postures using change discrimination and adjustment tasks. Results showed that  
10 lifted arms were misremembered as lower and as more similar to the nearest biomechanically  
11 plausible postures. Inverting the body stimuli eliminated both biases, ruling out visual confounds.  
12 These findings show that visual memory representations of body postures are modulated by a  
13 combination of category-general and category-specific priors.

14 *Keywords:* Body; Postures; Prior; Bias; Bayesian theory; Expectation

15

## 16 Introduction

17 Body posture is an important social cue that provides information about others' emotions, intentions,  
18 and mental states. The pressure to quickly and accurately recognize bodies and their movements has  
19 resulted in humans' typically excellent performance in detecting and discriminating body posture  
20 and body motion <sup>1-4</sup>, a skill that is supported by dedicated brain regions in visual cortex including  
21 the extrastriate body area <sup>5</sup>, fusiform body area <sup>6</sup>, and superior temporal sulcus <sup>7</sup>. When bodies are  
22 presented inverted, which is inconsistent with our daily experience, the ability to detect and  
23 discriminate postures is impaired <sup>2,3,8-10</sup>. This inversion effect is more pronounced for faces and bodies  
24 than for other objects, indicating more configural processing for these visually highly familiar stimuli  
25 <sup>2,9</sup>.

26 Owning a body ourselves, we also have extensive motor, tactile, and proprioceptive experience of a  
27 body and its dynamics <sup>11</sup>. Neuropsychological evidence suggests that we have an internal model of  
28 the physical relationships between body parts that helps us execute our own actions and understand  
29 those of others <sup>12</sup>. Together with our extensive visual experience, these sensory modalities provide  
30 us with additional knowledge of hierarchical limb structure, the possible range of movements of  
31 joints, and the effort required for executing specific body actions. Here, we asked whether our  
32 experience observing and executing a biased range of body postures modulates the perceptual  
33 representation of these postures.

34 Previous research has shown that perception is influenced by knowledge and expectations <sup>13,14</sup>.  
35 Specifically, Bayesian accounts of perception propose that priors are integrated with sensory input,  
36 weighted by their uncertainty to support perceptual inference <sup>15-17</sup>. An example of this integration is  
37 the hollow-face illusion: a mask viewed from the concave side still gives a vivid impression of a  
38 convex face, due to the strong prior of faces being convex. Priors are shaped by environmental  
39 statistics, including the distribution of visual properties like orientation <sup>18,19</sup>, basic physical principles  
40 of motion <sup>20,21</sup>, gravity <sup>22,23</sup>, and physical state <sup>24</sup>.

41 Effects of prior knowledge on perception have also been observed for the perception of body  
42 movements. For example, observers tend to perceive or imagine a biomechanically plausible  
43 movement compared to an awkward one <sup>25</sup>. Furthermore, when observing apparent body  
44 movements, the perceived movement tends to follow a biomechanically plausible path, even if that  
45 path is longer <sup>26</sup>. Other examples include the finding that the extrapolation of biomechanically  
46 plausible movements is larger than implausible ones <sup>27</sup>, and that unstable postures leaning backward  
47 are judged to be more likely to fall than postures leaning forward <sup>28</sup>. These findings indicate that the  
48 perceptual interpretation of real or apparent body movements is influenced by knowledge of  
49 biomechanical constraints. However, body movements involve sequences of postures unfolding over  
50 time, requiring the viewer to predict and construct the upcoming posture. A single static posture  
51 may not automatically evoke such predictive processes. It is therefore unclear whether perceptual  
52 representations of static postures are influenced by priors in the way that body movements are.

53 To address this question, we considered two priors that are relevant for static body postures. The  
54 first is the general prior of gravity: Gravity is an omnipresent force that pushes everything down,

55 resulting in a strong prior for perception and action<sup>29</sup>. Previous studies have found that the position  
56 of an unsupported object will be remembered as lower, in line with the influence of a gravity prior  
57<sup>30,31</sup>. Accordingly, because arms will fall if not supported by muscles, we hypothesized that a lifted  
58 arm will be remembered as slightly lower than its actual position.

59 The second prior follows from biomechanical constraints. Because of the biomechanical structure of  
60 the body, particularly the range of motion of joints, postures are confined to a limited range. For  
61 example, the shoulder joints can flex from the resting position to the front by 180 degrees, but to the  
62 back, they can only extend to around 60 degrees<sup>32,33</sup>. If prior knowledge of these constraints informs  
63 perception, the representation of a nearly impossible posture may be biased towards the nearest  
64 possible posture. Crucially, biomechanical constraints can counteract the effect of gravity: an arm  
65 raised in front of the head will fall but an arm raised behind the head can hardly fall lower (Figure  
66 1).

67 To test these hypotheses, we used four arm postures subject to one or both of the two biases (Figure  
68 1). We predicted that lifted arms will generally be remembered as lower, towards the ground,  
69 reflecting a gravity-related bias. Furthermore, we predicted that lifted arms will be biased towards  
70 biomechanically possible postures. Specifically, biomechanical constraints limit further movement  
71 of the arm when the arm is raised behind the head, counteracting the gravity bias (Figure 1b), while  
72 adding to the gravity bias when the arm is behind the hip (Figure 1d).

73 We designed two tasks to probe the existence of biases in body posture representation due to gravity  
74 and biomechanical constraints. In the change discrimination task (Experiment 1, Figure 2a),  
75 participants compared two sequential postures whose arm positions slightly differed, with the second  
76 arm posture being slightly higher or lower. We first tested upper postures (Fig. 1a & 1b) in  
77 Experiment 1a, then followed with lower postures (Fig. 1c & 1d) in Experiment 1b to generalize the  
78 findings to visually different postures. We then replicated the results using a within-subject design  
79 with an adjustment task (Experiment 2, Figure 2b) where the participants needed to reproduce the  
80 remembered posture by adjusting the arm of a figure. The error of their adjustment reflects memory  
81 biases. Finally, we replicated these results again in Experiment 3, and used inverted body postures as  
82 control stimuli to test whether the effects rely on configural body processing.

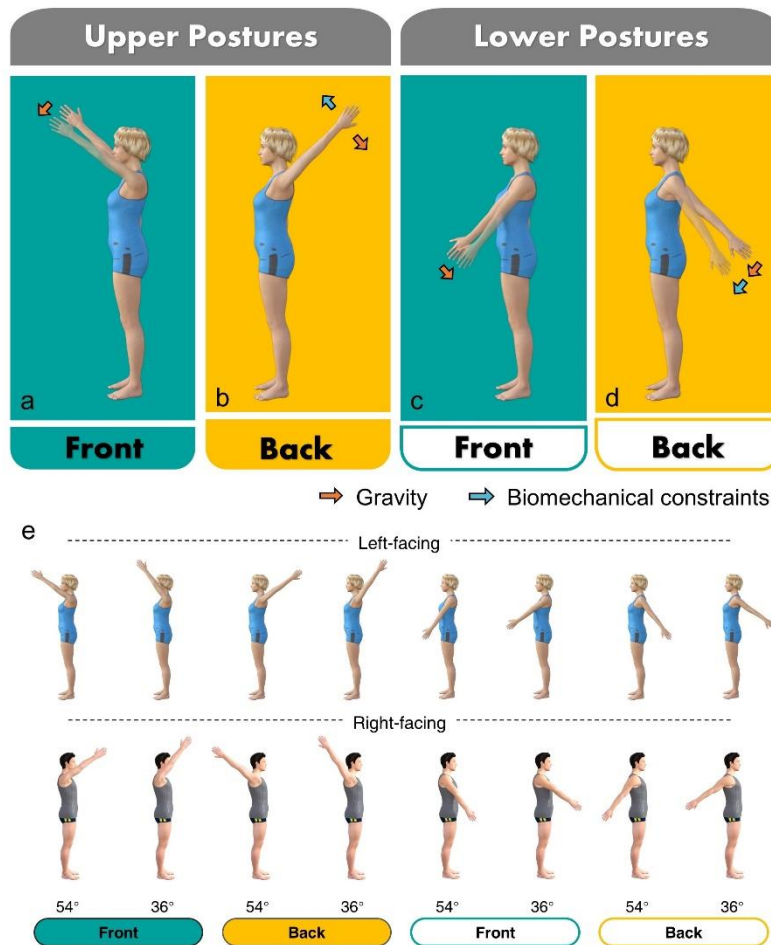

83

84 Figure 1. a)~d), Illustration of the hypothesis. The orange and blue arrows indicate the direction of the  
 85 gravity and the biomechanical constraints, respectively; transparent arms indicate the predicted  
 86 perceived arm positions according the two hypotheses. Here the arrows and the predicted arms only  
 87 suggest the direction but not the extent of the effects. For the Upper-back posture (b), gravity and the  
 88 biomechanical constraints point in opposite direction, potentially eliminating each other's influence.  
 89 For the lower-back posture (d), gravity and the biomechanical constraints go in the same direction,  
 90 their effects potentially adding up. e), Stimulus examples. For each quadrant, we show the lowest  
 91 posture (54°) and the highest posture (36°) used in the experiments. In the experiment, both figures  
 92 had left-facing and right-facing versions, though only one of them is shown here.

## 93 Results

### 94 Experiment 1a & 1b

95 In this change discrimination task, participants needed to decide whether the arm in the second  
 96 posture was higher or lower than in the first one (Figure 2a). In the absence of biases, participants  
 97 should detect upward and downward changes equally well. Instead, if priors bias the representation  
 98 of the first posture during the brief interval, we may observe that detecting a change in one direction  
 99 is easier than a change in the other. The perceptual biases of interest were thus quantified by the  
 100 criterion (c) from signal detection theory. Taking upward movement as the signal, a negative

101 criterion means that participants responded more up than down. Data of Experiment 1a (upper  
102 postures, N = 60) and 1b (lower postures, N = 60) were pooled in the analysis.

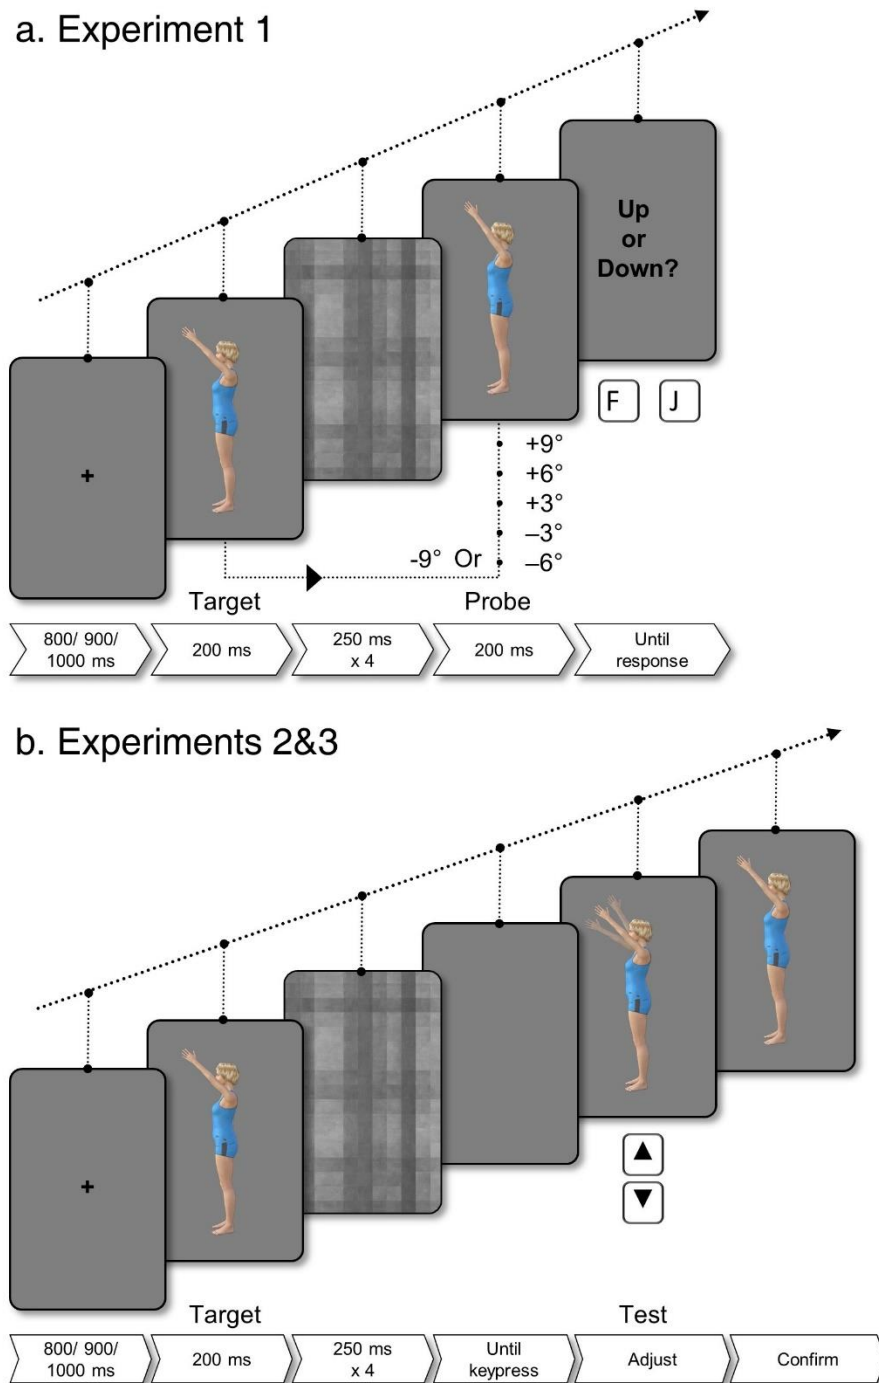

104 Figure 2. Trial Procedures. a) Change discrimination task used in Experiments 1a and 1b. In the trial  
105 shown here, the target is 45 degrees in the Upper-front, and the probe moves -9 degrees (i.e.,  
106 upwards). Participants indicated whether the arm had moved up or down. The up-down text screen is  
107 shown for illustration purposes. b) Adjustment task used in Experiments 2 and 3. The target posture  
108 was either 36, 39, 42, 48, 51, or 54 degrees within each quadrant. The starting posture in the test  
109 image was chosen randomly from 30 to 60 from the same quadrant as the target. Participants adjusted

110 the arm, indicated by transparent arms, using the up-arrow and down-arrow keys to match the target  
 111 angle.

112 Participants' responses were in line with a gravity bias (Figure 3): The arm in the target posture was  
 113 remembered as lower than its actual position, as indexed by a criterion significantly below zero for  
 114 all postures (Upper-front:  $M = -0.25$ , 95% CI =  $[-0.32, -0.18]$ ,  $t(59) = -7.08$ ,  $p < .001$ ,  $d = -0.91$ ,  $BF_{10} =$   
 115  $5.75E6$ ; Upper-back:  $M = -0.144$ , 95% CI =  $[-0.21, -0.07]$ ,  $t(59) = -4.38$ ,  $p < .001$ ,  $d = -0.57$ ,  $BF_{10} = 413$ ;  
 116 Lower-back:  $M = -0.11$ , 95% CI =  $[-0.19, -0.04]$ ,  $t(59) = -2.96$ ,  $p = .004$ ,  $d = -0.38$ ,  $BF_{10} = 7.14$ ) but not  
 117 the Lower-front:  $M = -0.06$ , 95% CI =  $[-0.14, 0.02]$ ,  $t(59) = -1.60$ ,  $p = .114$ ,  $d = -0.21$ ,  $BF_{10} = 0.47$ .

118 Next, we combined Experiments 1a and 1b using a mixed ANOVA with arm height (upper,  
 119 Experiment 1a; versus lower, Experiment 1b) as a between-subject factor and arm direction as a  
 120 within-subject factor to test the presence of a biomechanical bias. As illustrated in Figure 1,  
 121 compared to the front, the downward bias in the back should be diminished by biomechanical  
 122 constraints when in the upper quadrant (Figure 1a vs. 1b), but strengthened when in the lower  
 123 quadrant (Figure 1c vs. 1d). We thus predicted an interaction between arm height and arm direction.  
 124 We indeed found this interaction (Figure 3):  $F(1, 118) = 8.09$ ,  $p = .005$ ,  $\eta^2_p = 0.064$ ,  $BF_{10} = 7.63$ .  
 125 Specifically, for the upper postures, the gravity bias was stronger in the front than in the back,  $M =$   
 126  $-0.108$ , 95% CI =  $[-0.03, -0.19]$ ,  $t(59) = -2.74$ ,  $p = .008$ ,  $d = -0.35$ ,  $BF_{10} = 4.17$ , indicating that the  
 127 upward biomechanical constraint counteracted the gravity bias. The downward bias for the Lower-  
 128 back was numerically stronger than that for the Lower-front, in line with an additive effect of  
 129 biomechanical constraint bias and gravity bias, but this difference did not reach significance:  $M =$   
 130  $0.05$ , 95% CI =  $[-0.03, 0.13]$ ,  $t(59) = 1.3$ ,  $p = .197$ ,  $d = 0.17$ ,  $BF_{10} = 0.32$ . All statistics are provided in  
 131 Table S1, S2, and S3.

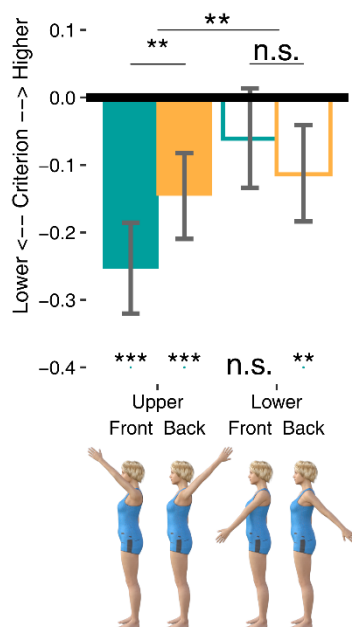

132

133 Figure 3. Criterion results for the four conditions in Experiment 1. A negative criterion reflects a bias  
 134 to respond “up”, indicating that the first posture was remembered as lower than the second posture.  
 135 We interpret this overall bias as reflecting knowledge of gravity. The difference between Front and

136 Back indicates that the criterion was influenced by whether the arm is at an extreme posture. Results  
 137 showed an interaction between Front/Back and Upper/Lower, in line with biomechanical constraints  
 138 (see Figure 1).

139 \*\*\*:  $p < .001$ , \*\*:  $p < .01$ , \*:  $p < .05$ , n.s.: not significant. Error bars denote 95% CI.

## 140 Experiment 2

141 The change discrimination task provided evidence for both gravity and biomechanical biases. We  
 142 wondered whether these results would be specific to the change detection task, in which the two  
 143 consecutive body postures may be perceived as part of an action. If so, the results could reflect biases  
 144 in human action perception rather than biases in the static representation of the target posture. To  
 145 address this, in Experiment 2 (N=60) we tested whether the identified biases replicate in an  
 146 adjustment task (Figure 2b), in which participants were asked to remember a target posture and then  
 147 to reproduce this target posture by adjusting the arm of a human figure on the screen.

148

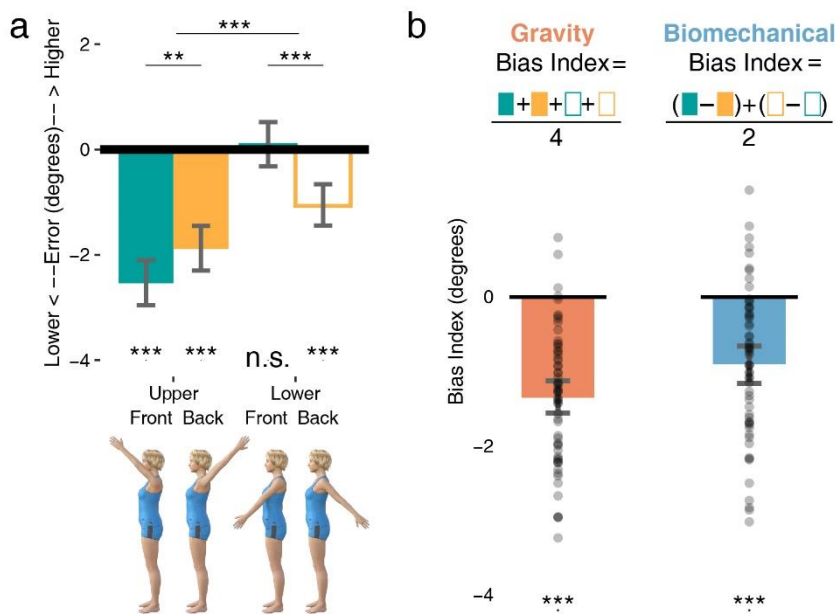

149

150 Figure 4. Results of Experiment 2. a) Mean error of the four conditions. b) Bias Indexes for individual  
 151 participants. On the top are the calculation methods for the two indexes. \*\*\*:  $p < .001$ , \*\*:  $p < .01$ , \*:  $p$   
 152  $< .05$ , n.s.: not significant. Error bars denote 95% CI.

153 In the adjustment task, the direction and magnitude of biases are directly reflected in the direction  
 154 and magnitude of the adjustment error. A negative error indicates that the target was remembered  
 155 as lower than its actual position, reflecting a gravity bias. This was the case for all of the postures  
 156 tested (Figure 4a, Upper-front:  $M = -2.54$ , 95% CI = [-2.97, -2.11],  $t(59) = -11.8$ ,  $p < .001$ ,  $d = -1.52$ ,  
 157  $BF_{10} = 1.68E14$ ; Upper-back:  $M = -1.89$ , 95% CI = [-2.34, -1.44],  $t(59) = -8.46$ ,  $p < .001$ ,  $d = -1.09$ ,  $BF_{10}$   
 158  $= 9.86E8$ ; Lower-back:  $M = -1.07$ , 95% CI = [-1.48, -0.66],  $t(59) = -5.22$ ,  $p < .001$ ,  $d = -0.67$ ,  $BF_{10} =$   
 159  $6.52E3$ ) except for the lower-front ( $M = 0.09$ , 95% CI = [-0.35, 0.52],  $t(59) = -0.39$ ,  $p = .694$ ,  $d = 0.05$ ,



160  $BF_{10} = 0.15$ ).

161 Also consistent with Experiment 1, a two-way repeated-measures ANOVA showed an interaction  
162 between arm height and arm direction, revealing the effect of biomechanical constraints,  $F(1, 59) =$   
163  $48.1, p < .001, \eta^2_p = 0.45, BF_{10} = 2.02E8$ . As in Experiment 1, for the upper postures, the gravity bias  
164 was stronger in the front than the back:  $M = -0.65, 95\% CI = [-0.25, -1.05], t(59) = -3.28, p = .002, d$   
165  $= -0.42, BF_{10} = 16.5$ . By contrast, as predicted, for the lower postures, the gravity bias was stronger in  
166 the back than the front:  $M = -1.15, 95\% CI = [-0.79, -1.52], t(59) = -6.32, p < .001, d = -0.82, BF_{10} =$   
167  $3.44E5$ , showing that biomechanical constraints also influence visual memory of lower arm postures.

168 For visualization purposes, we computed two indexes that reflect the two hypothesized effects. The  
169 gravity bias was given by the overall adjustment error, averaged across the four conditions (Upper-  
170 front, Upper-Back, Lower-front, Lower-back). The biomechanical constraint bias was indexed by  
171 the difference between postures with vs without biomechanical constraint, averaged across upper  
172 and lower postures (the mean of (Upper-front – Upper-back) and (Lower-back - Lower-front); Figure  
173 4b). Figure 4b shows the bias indexes for individual participants. Taking the four postures together,  
174 the error caused by gravity was significantly different from zero,  $M = -1.35, 95\% CI = [-1.58, -1.12],$   
175  $t(59) = -11.61, p < .001, d = -1.50, BF_{10} = 8.50E13$ . The overall biomechanical constraint ( $M = -0.90,$   
176  $95\% CI = [-1.16, -0.64], t(59) = -6.94, p < .001, d = -0.90, BF_{10} = 3.37E6$ , also reflected in the interaction  
177 in the ANOVA) was also highly consistent across individuals. These results confirm and extend the  
178 results of Experiment 1 using a different task, generalizing the effects to a scenario where no action  
179 or motion is implied.

## 180 Experiment 3

181 Experiment 3 aimed to test whether the effects were caused by local visual features, including the  
182 overlap between the arm and the head, the curvature of the arm, and so on. A prominent feature of  
183 body perception is its susceptibility to inversion. Inversion has been shown to disrupt body and face  
184 perception more than other objects, which is believed to reflect the disrupted configural processing  
185 of bodies and faces<sup>2,3,8,10,34</sup>. Inverted bodies thus serve as an ideal control for typical upright bodies  
186 since they are identical in terms of local features but are processed less as integral postures. In  
187 Experiment 3, we tested whether the effects of gravity and biomechanical constraints were  
188 contingent on the configural processing instead of local features using the inversion effect ( $N = 66$ ).

189 We found a significant three-way interaction among arm direction, arm height and body orientation,  
190  $F(1,65) = 7.15, p = .009, \eta^2_p = .10, BF_{10} = 10.3$ , indicating that body orientation modulated the  
191 interaction between arm height and arm direction. Inspecting upright and inverted conditions  
192 separately (Figure 5), the interaction of arm height and arm direction was significant for the upright  
193 body, replicating results from Experiment 2,  $F(1,65) = 24.1, p < .001, \eta^2_p = .27, BF_{10} = 8.50E4$ . In  
194 contrast, the inverted body did not show the interaction between arm height and arm direction,  
195  $F(1,65) = 1.91, p = .171, \eta^2_p = .029, BF_{10} = 0.55$ . A main effect of body orientation ( $F(1,65) = 46.9, p$   
196  $< .001, \eta^2_p = .42, BF_{10} = 2.92E6$ ) showed that inversion diminished the overall negative adjustment  
197 error, indicating a reduced gravity bias (Figure 5).

198 As in Experiment 2, bias indexes were also calculated for visualization purposes and for a more direct

199 description of the inversion effect. As shown in Figure 5b, inversion significantly reduced both  
 200 gravity bias:  $M = 1.25$ , 95% CI = [0.88, 1.61],  $t(65) = 2.67$ ,  $p < .001$ ,  $d = 0.84$ ,  $BF_{10} = 3.52E6$  and  
 201 biomechanical constraints:  $M = 0.61$ , 95% CI = [0.15, 1.06],  $t(65) = 2.67$ ,  $p = .009$ ,  $d = -0.33$ ,  $BF_{10} =$   
 202 3.54. This experiment excluded the possibility that these biases emerge from part-based processing  
 203 of bodies or by the stimuli's low-level visual features.

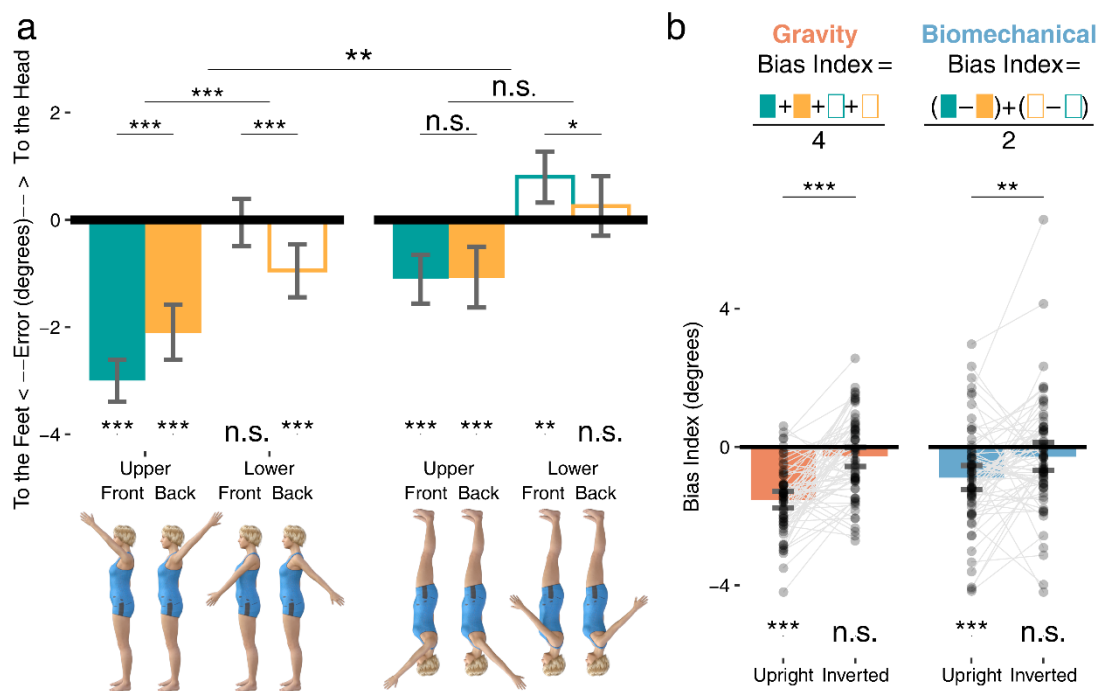

204

205 Figure 5. Results of Experiment 3. a) Mean error of the four conditions. Left: upright, Right: inverted.  
 206 b) Bias Indexes for individual participants. On top are the calculation methods for the two indexes. \*\*\*:  
 207  $p < .001$ , \*\*:  $p < .01$ , \*:  $p < .05$ , n.s.: not significant. Error bars denote 95% CI.

## 208 Discussion

209 The current results demonstrate that priors resulting from gravity and biomechanical constraints  
 210 jointly shape visual memory representations of human body postures. In three experiments, these  
 211 effects were replicated both by directly repeating the same task and by using a different task.  
 212 Importantly, the biases were absent when bodies were inverted, ruling out low-level visual  
 213 confounds and indicating that the biases emerge from whole-body representations. Together, the  
 214 two tasks we used excluded potential confounds of motion perception, response biases and local  
 215 visual feature processing, demonstrating a top-down influence on static body representations.

216 Our results are well explained by Bayesian theories in which perception is the result of an interplay  
 217 between sensory input and priors<sup>15,35</sup>. Priors are shaped by environmental statistics<sup>18</sup> and serve to  
 218 achieve optimal inference<sup>17</sup>. In the case of body postures, multiple regularities jointly shape the prior  
 219 distribution of postures, including biomechanical constraints that confine postures to a certain range  
 220 and gravity that pulls limbs downward. When input is more ambiguous, priors will have a stronger

221 influence, such that we tend to perceive what is most likely according to our prior. In our task, a  
222 body posture had to be maintained in visual memory for a brief interval. The fidelity of the sensory  
223 information will be reduced during this interval, making the posture representation susceptible to  
224 the influence of priors. Following this account, the biases should become larger when the  
225 uncertainty about the stimuli is increased, which can be tested in future studies, for example by  
226 degrading the stimulus or by increasing the memory interval.

227 Besides gravity and biomechanical constraints, the prior distribution of postures is also influenced  
228 by other factors. For example, common postures and movements like standing, walking, and using  
229 tools will lead to a relatively high probability of arms being in the lower front position. This might  
230 also explain the current finding that the lower front arm postures were judged and adjusted more  
231 accurately than the other postures (see Figure 3, 4a, 5a). Analyzing posture probabilities in large  
232 video databases and measuring biases at a higher resolution of the posture space would help  
233 establishing the link between posture probability and the biases observed here.

234 An alternative interpretation of the current findings is that they reflect visuomotor simulation,  
235 where observed postures are simulated in the viewer's motor system as a mechanism to understand  
236 postures<sup>36</sup>. This interpretation has been used to account for the finding of smaller representational  
237 momentum for biomechanically awkward arm movements<sup>37</sup>. However, although the motor system  
238 has been shown to be activated during action observation<sup>38,39</sup>, motor simulation may not be essential  
239 for understanding actions or representing body postures, as individuals born without upper limbs  
240 exhibit similar performance in action observation, action prediction, and mental imagery of postures  
241<sup>40,41</sup>. Knowing whether the effects observed here are also present in individuals born without limbs  
242 will give us more insight into the contributions of visual and motor experience. Furthermore, if  
243 motor experience plays a role in the visual memory of body postures, we might also expect an  
244 influence of commonly self-experienced postures<sup>42,43</sup>. Accordingly, factors that influence an  
245 individual's motor experience, including age<sup>44</sup>, obesity<sup>45</sup>, pain<sup>46,47</sup>, and other clinical conditions,  
246 could potentially influence the biases reported here.

247 The current findings also raise new questions about the neural representation of body postures.  
248 Neuroimaging research on body perception has provided evidence for multiple cortical areas that are  
249 specifically engaged in body perception, including the extrastriate body area (EBA, Downing et al.,  
250 2001) and the fusiform body area (FBA, Peelen & Downing, 2005; Schwarzlose et al., 2005).  
251 Compared to the more extensively studied fusiform face area (FFA, Kanwisher et al., 1997), little is  
252 known about the representational structure of these areas<sup>51</sup>. It has been shown that the FFA  
253 represents faces in a face space centered around the average face, with distances from the center  
254 representing the deviation from the mean face<sup>52,53</sup>. Based on the current results that knowledge of  
255 body structure informs posture perception, the body-selective areas may store an internal model of  
256 the body, including its constraints. Given the many combinations of body part postures, it would be  
257 advantageous for neurons to be tuned primarily to biomechanically possible postures. Indeed,  
258 previous work has shown that body representations in the EBA more strongly represent postures in  
259 commonly experienced visual field locations<sup>54</sup>. Our results suggest that the representational space  
260 of body postures in body-selective regions might be biased, reflecting perceived rather than physical  
261 distances between postures.

262 In sum, we show that body posture representation is biased towards the ground and towards  
263 biomechanically plausible postures, indicating an influence of both general knowledge of the world  
264 and specific knowledge of the body. These findings may reflect the influence of an internal model  
265 of the body based on environmental statistics. By employing such an encoding scheme, the visual  
266 system can efficiently predict upcoming postures, a critical component for humans' ability to read  
267 others' actions, intentions, and social interactions<sup>55</sup>.

#### 268 **Limitations of the study**

269 This study revealed that the visual memory of a lifted-arm posture is modulated by knowledge about  
270 the world and the biomechanics of the body. A limitation of our study is that we only tested arm  
271 postures; future studies need to generalize our findings to other postures, for example leg postures.  
272 Another limitation is that our study could not address the origin of the prior. Future research is  
273 needed to determine whether visual experience, motor experience, or both contribute to the biases  
274 found here.

## 275 **STAR★Methods**

### 276 **RESOURCE AVAILABILITY**

#### 277 **Lead contact**

278 Further information and requests for resources and reagents should be directed to and will be  
279 fulfilled by the lead contact, Qiu Han ([qiu.han@donders.ru.nl](mailto:qiu.han@donders.ru.nl)).

#### 280 **Materials availability**

281 All the stimuli generated for this study are publicly available at <https://osf.io/qmtkw/>.

#### 282 **Data and code availability**

283 All the codes, and raw data related to the experiments reported here are publicly available at  
284 <https://osf.io/qmtkw/>.

285 Additional information required to reanalyze the data reported in this paper is available from the  
286 lead contact upon request.

## 287 **EXPERIMENTAL MODEL AND STUDY PARTICIPANT**

### 288 **DETAILS**

289 All the studies were conducted on online platforms. Participants of Experiment 1 were recruited  
290 using the SONA system in return for course credits. Participants of Experiments 2 and 3 were  
291 recruited through Prolific in return for monetary reward. We required the participants to be above  
292 18 years old with normal or corrected-to-normal vision. Digital informed consent was obtained from  
293 all participants. The procedures were approved by the University's Ethical committee (Ethics no.:  
294 ECSW-2022-079).

295 The desired sample size was set to 60 for all experiments before testing. This was determined by

296 power analysis using Jamovi suggesting that a sample size of 52 was needed to detect a minimum  
297 effect size of  $d = 0.4$  with 80% power, as suggested recently as a first estimate for a reproducible effect  
298 size<sup>56</sup>. We rounded this recommendation up to 60, resulting in 80% power to detect a minimum  
299 effect size of  $d = 0.368$ . Recruitment stopped when the sample size reached 60 after the exclusion of  
300 low-quality data (see METHOD DETAILS). For Experiment 1a, we recruited 75 participants. Of  
301 these, one participant did not finish the task and 14 were excluded. For Experiment 1b, we recruited  
302 67 participants. Of these, two did not finish the task and five were excluded. We thus acquired an  
303 effective sample size of 60 for both Experiment 1a (49 females, 11 males; age:  $M = 20.1$ , range = [18,  
304 36]) and Experiment 1b (48 females, 12 males, 2 other; age:  $M = 20.6$ , range = [18, 47]).

305 Experiment 2 adopted a within-subject design. The sample size was kept consistent with Experiment  
306 1. 60 subjects (30 females, 30 males; age:  $M = 33.42$ , range = [21, 45]) were recruited and no one was  
307 excluded.

308 In Experiment 3, 66 participants (21 females, 45 males; age:  $M = 30.04$ , range = [18, 45]) were  
309 recruited. First, we recruited the intended sample size of 60, however, the number of participants  
310 starting with the upright vs inverted condition was not yet balanced when the sample size reached  
311 60, therefore six additional participants were recruited. Data from only the first 60 participants  
312 yielded highly similar results.

## 313 **METHOD DETAILS**

### 314 **Experiment 1**

315 **Stimuli:** Body images were generated by rendering digital human models in DAZ studio 4.15 (Daz  
316 Productions, Inc). A female character and a male character were used. The characters were standing  
317 in profile, one arm lifted, the other leaning naturally on the hip. The lifted arm positions were  
318 categorized into four quadrants (Figure 1): two directions (front and back) x two arm heights (upper  
319 and lower). In each quadrant, we designated the upper bound of that quadrant as the zero point,  
320 with larger angles meaning that the arm is lower, i.e., closer to the feet. The arm could be presented  
321 at an angle of 36, 39, 42, 45, 48, 51, or 54 degrees in each quadrant. Both left-facing and right-facing  
322 figures were generated, so that an arm in front of the body was equally often presented in the left  
323 and right visual field to avoid possible confounds of visual field differences between the conditions  
324 (Figure 1e). The lifted arm was always on the viewer's side (right arm lifted when facing right, left  
325 arm lifted when facing left) to avoid the arm being occluded by other body parts.

326 Mask images were grey-scale checkerboard images. Body images were 300 pixels wide, 480 pixels  
327 high. Size in degree depended on the online participant's screen resolution and the eye-to-screen  
328 distance. Mask images were 350 pixels wide, 525 pixels high. Masks were presented slightly larger  
329 than the body to achieve a better masking effect.

330 **Procedures:** Experimental procedures were programmed with jsPsych library<sup>57</sup> and the  
331 psychophysics plugin<sup>58</sup>. Experiments 1a and 1b tested the front and the back arm directions for  
332 upper postures (Experiment 1a) and lower postures (Experiment 1b). Data were aggregated for  
333 analysis. Experiment 1a also included a machine condition which was not relevant to the purpose of  
334 the current study (see Figure S2).

335 In each trial, a fixation cross was first presented at the center for 800, 900, or 1000 ms, then a target  
336 body posture of either 36, 39, 42, 45, 48, 51, or 54 degrees in either quadrant was shown for 200 ms  
337 (Figure 2a). Participants were instructed to remember the posture of the target and hold it in memory.  
338 Immediately after the target, a 1000-ms dynamic mask consisting of four consecutive checkerboard  
339 images (250 ms each) was shown to minimize aftereffects and/or apparent motion of the arm, after  
340 which the probe image appeared for 200 ms. Compared to the target, the arm in the probe would  
341 move upwards or downwards by an angle of 3, 6, or 9 degrees (equiprobable). The task was to judge  
342 whether the arm had moved up or down relative to the target. Participants indicated their choice by  
343 pressing F or J on the keyboard. The key-response mapping was counterbalanced across participants.  
344 Participants were asked to respond as accurately and as quickly as possible. The trial ended upon  
345 response or 4000 ms after the probe had disappeared.

346 Each combination of arm direction and angle difference included 24 trials, resulting in 288 trials in  
347 total, separated into four blocks. Angle difference, arm direction, and figure gender were completely  
348 interleaved while facing direction was kept identical within blocks to avoid extra effort for switching  
349 viewpoint between trials. The two left-facing and two right-facing blocks were in ABBA order, with  
350 about half of the subjects starting with a left-facing block and the others starting with a right-facing  
351 block. A practice session of 12 trials was delivered before the formal experiment. Feedback on the  
352 accuracy and mean response time across conditions were shown to the participant at the end of each  
353 block.

## 354 **Experiment 2**

355 Experiment 2 included the same four conditions as in Experiment 1. In each quadrant, six target  
356 angles (36, 39, 42, 48, 51, and 54) were used. Consistent with Experiment 1, a fixation and then the  
357 target posture was shown, followed by the mask. After the mask disappeared, the subjects were  
358 instructed to press one of the left-arrow or right-arrow keys to show the test image for adjustment.  
359 The initial posture of the test was randomized between 30 and 60 degrees, but always in the same  
360 quadrant as the target. Participants then pressed up and down arrow keys to manipulate the arm of  
361 the test image to move upwards or downwards. After adjusting the arm to the remembered target  
362 position, participants pressed space to confirm their answer. If no response was made, the trial ended  
363 after 10 s. If the test image was not initiated within 3 s after the mask, the trial skipped and  
364 participants were warned to start the adjustment more quickly in the following trials.

365 All the other factors, were kept consistent with Experiment 1. Facing direction was blocked, and  
366 other factors were interleaved. Each angle in each quadrant was presented eight times, resulting in  
367 48 trials for each quadrant, 192 trials in total. The trials were divided into four blocks, with the order  
368 manipulated as in Experiment 1. Two mini practice blocks were completed before the start of the  
369 experiment. Feedback on average absolute error was given at the end of each block.

## 370 **Experiment 3**

371 The task was identical to Experiment 2 except that both upright and inverted conditions were tested.  
372 The inverted body images were generated by vertically flipping the upright images. Half of the  
373 participants started with the upright condition and half with the inverted condition. Both upright  
374 and inverted conditions contained a left-facing block and a right-facing block, with the order  
375 randomized across participants but kept the same for upright and inverted conditions. Within each



376 block, trials of different combinations of arm direction, arm height, within-quadrant angle, and  
377 figure identities were interleaved. Because of the inclusion of the inverted condition, the trial  
378 number for each angle was halved compared to Experiment 2. In total, Upper-front, Upper-back,  
379 Lower-front, and Lower-back all included 24 trials for the upright and 24 for the inverted condition.

## 380 **QUANTIFICATION AND STATISTICAL ANALYSIS**

### 381 **Experiment 1**

382 Responses with RTs < 250 ms (relative to probe onset) were excluded (0.10% of the total number of  
383 trials across Exp 1a and 1b), as these most likely reflect anticipatory responses. For each participant,  
384 data quality was inspected by plotting the percentage of up responses for each angle difference level  
385 in each quadrant (Figure S1a). Participants following task instructions should show an increase in  
386 the percentage of up responses as the angle difference decreases. That is, the more obvious that the  
387 arm moves up, the more likely people choose up, yielding a sigmoid curve. Some participants  
388 exhibited a flat or reversed curve, suggesting that they misunderstood the task or pressed randomly.  
389 These participants were detected using a slope index (Figure S1b) of the difference between the mean  
390 up response percentage of the two most obvious moving-up levels (-9 and -6) and the mean of the  
391 two most obvious moving-down levels (9 and 6). Participants with a slope index below 0.2 in either  
392 the front or the back condition were excluded, resulting in 14 exclusions in Experiment 1a and 5  
393 exclusions in Experiment 1b.

394 We calculated individual criterion in each condition from the hit rate (up response percentage when  
395 the arm actually moved up) and false alarm rate (up response percentage when the arm actually  
396 moved down) using the Psycho package<sup>59</sup> in R<sup>60</sup>:

$$397 \quad c = -(z(\text{hit}) + z(\text{false alarm})) / 2$$

398 Statistics were done using bruceR package in R and JASP (JASP Team, 2023). Both frequentist  
399 results and Bayesian factor (BF) were provided. By convention, a BF (the ratio of the probability of  
400 acquiring the data given one model against another) > 3 indicates some evidence supporting the  
401 first model<sup>61</sup>. For BF ANOVA, each effect was tested by comparing models that contain that effect  
402 against their equivalent models stripped of the effect. Results of d prime were also analyzed and are  
403 presented in Figure S1. For simplicity, statistics of effects of interest are reported in the Results  
404 section and all the other statistics are provided in Table S1, S2, and S3.

### 405 **Experiment 2**

406 Trials in which participants pressed space before adjusting the test image and trials in which the test  
407 image was not initiated within 3 s after the mask were discarded. Trials with an absolute error larger  
408 than 15 degrees were also discarded. Altogether, this led to the rejection of 5.41% of the total number  
409 of trials. No participants were excluded.

410 The error of the response from the target was used as the index of biases, calculated as the target  
411 angle minus the response angle. For example, a target of 48 degrees adjusted as 52 degrees would  
412 yield an error of -4 degrees. Negative values indicate that the posture was adjusted to be lower than  
413 it was actually shown. Errors of all trials in one quadrant were averaged to get the mean error for

414 each quadrant of each participant. Group mean error data were tested in the same way as the  
415 criterion in Experiment 1, except that a repeated-measures ANOVA was used instead of a mixed  
416 ANOVA.

### 417 **Experiment 3**

418 The coding of angles for the inverted condition followed a body-centered reference frame rather  
419 than a spatial reference frame. For example, negative errors for an upright body indicate that the  
420 arm was adjusted as closer to the feet and thus closer to the lower part of the screen. Similarly,  
421 negative errors for an inverted body indicate that the arm was adjusted as closer to the feet; however,  
422 because of the inversion and the reference to the body, this is now closer to the upper part of the  
423 screen.

424 Data cleaning procedures were identical to Experiment 2, with an exclusion rate of 6.90% of the total  
425 number of trials. Adjustment errors for each quadrant were averaged for upright and inverted  
426 conditions separately. A three-way repeated-measures ANOVA with arm height, arm direction, and  
427 body orientation was conducted. Two bias indexes for upright and inverted conditions were  
428 calculated and compared with two-tailed t-tests to test whether inversion diminished the biases.

## 429 **Acknowledgments**

430 We thank Paul E. Downing and Eelke Spaak for feedback on earlier versions of the manuscript and  
431 the Peelen Lab members for the helpful suggestions on experimental design during lab meetings.

432 This project has received funding from the China Scholarship Council (CSC), European Union's  
433 Horizon 2020 research and innovation programme under the Marie Skłodowska-Curie (grant  
434 agreement No. 101033489), and European Research Council (ERC) under the European Union's  
435 Horizon 2020 research and innovation programme (grant agreement No 725970).

## 436 **Author Contributions**

437 Qiu Han: Conceptualization, Methodology, Software, Investigation, Formal Analysis, Validation,  
438 Visualization, Writing – Original Draft, Writing – Review & Editing, Funding Acquisition

439 Marco Gandolfo: Conceptualization, Methodology, Software, Validation, Writing – Review &  
440 Editing, Funding Acquisition

441 Marius Peelen: Conceptualization, Methodology, Validation, Writing – Review & Editing, Funding  
442 Acquisition

## 443 **Declaration of interests**

444 The authors declare no competing interests.

## 445 **References**



- 446 1. Neri, P., Morrone, M.C., and Burr, D.C. (1998). Seeing biological motion. *Nature* *395*, 894–  
447 896. 10.1038/27661.
- 448 2. Reed, C.L., Stone, V.E., Bozova, S., and Tanaka, J. (2003). The Body-Inversion Effect.  
449 *Psychol Sci* *14*, 302–308. 10.1111/1467-9280.14431.
- 450 3. Stein, T., Sterzer, P., and Peelen, M.V. (2012). Privileged detection of conspecifics:  
451 Evidence from inversion effects during continuous flash suppression. *Cognition* *125*, 64–  
452 79. 10.1016/j.cognition.2012.06.005.
- 453 4. Thorat, S., and Peelen, M.V. (2022). Body shape as a visual feature: Evidence from  
454 spatially-global attentional modulation in human visual cortex. *NeuroImage* *255*, 119207.  
455 10.1016/j.neuroimage.2022.119207.
- 456 5. Downing, P.E., Jiang, Y., Shuman, M., and Kanwisher, N. (2001). A Cortical Area Selective  
457 for Visual Processing of the Human Body. *Science* *293*, 2470–2473.  
458 10.1126/science.1063414.
- 459 6. Peelen, M.V., and Downing, P.E. (2007). The neural basis of visual body perception. *Nat*  
460 *Rev Neurosci* *8*, 636–648. 10.1038/nrn2195.
- 461 7. Grossman, E.D., and Blake, R. (2001). Brain activity evoked by inverted and imagined  
462 biological motion. *Vision Research* *41*, 1475–1482. 10.1016/S0042-6989(00)00317-5.
- 463 8. Gandolfo, M., and Downing, P.E. (2020). Asymmetric visual representation of sex from  
464 human body shape. *Cognition* *205*, 104436. 10.1016/j.cognition.2020.104436.
- 465 9. Reed, C.L., Stone, V.E., Grubb, J.D., and Mcgoldrick, J.E. (2006). Turning configural  
466 processing upside down: Part and whole body postures. *Journal of Experimental*  
467 *Psychology: Human Perception and Performance*, 73–87.
- 468 10. Yin, R.K. (1969). Looking at upside-down faces. *Journal of Experimental Psychology* *81*,  
469 141–145. 10.1037/h0027474.
- 470 11. Berlucchi, G., and Aglioti, S.M. (2010). The body in the brain revisited. *Exp Brain Res* *200*,  
471 25–35. 10.1007/s00221-009-1970-7.
- 472 12. de Vignemont, F. (2010). Body schema and body image—Pros and cons.  
473 *Neuropsychologia* *48*, 669–680. 10.1016/j.neuropsychologia.2009.09.022.
- 474 13. Bruner, J.S., and Postman, L. (1949). On the Perception of Incongruity: A Paradigm. *Journal*  
475 *of Personality* *18*, 206–223. 10.1111/j.1467-6494.1949.tb01241.x.
- 476 14. de Lange, F.P., Heilbron, M., and Kok, P. (2018). How Do Expectations Shape Perception?  
477 *Trends in Cognitive Sciences* *22*, 764–779. 10.1016/j.tics.2018.06.002.
- 478 15. Ma, W., Kording, K.P., and Goldreich, D. (2022). Bayesian Models of Perception and Action.

- 479 MIT Press. [https://mitpress.mit.edu/9780262047593/bayesian-models-of-perception-](https://mitpress.mit.edu/9780262047593/bayesian-models-of-perception-and-action/)  
480 [and-action/](https://mitpress.mit.edu/9780262047593/bayesian-models-of-perception-and-action/).
- 481 16. O'Reilly, J.X., Jbabdi, S., and Behrens, T.E.J. (2012). How can a Bayesian approach inform  
482 neuroscience? *Eur J of Neuroscience* *35*, 1169–1179. 10.1111/j.1460-9568.2012.08010.x.
- 483 17. Pouget, A., Beck, J.M., Ma, W.J., and Latham, P.E. (2013). Probabilistic brains: knowns and  
484 unknowns. *Nat Neurosci* *16*, 1170–1178. 10.1038/nn.3495.
- 485 18. Girshick, A.R., Landy, M.S., and Simoncelli, E.P. (2011). Cardinal rules: visual orientation  
486 perception reflects knowledge of environmental statistics. *Nat Neurosci* *14*, 926–932.  
487 10.1038/nn.2831.
- 488 19. Weiss, Y., Simoncelli, E.P., and Adelson, E.H. (2002). Motion illusions as optimal percepts.  
489 *Nat Neurosci* *5*, 598–604. 10.1038/nn0602-858.
- 490 20. Freyd, J.J., and Finke, R.A. (1984). Representational momentum. *Journal of Experimental*  
491 *Psychology: Learning, Memory, and Cognition* *10*, 126–132. 10.1037/0278-7393.10.1.126.
- 492 21. McBeath, M.K., Morikawa, K., and Kaiser, M.K. (1992). Perceptual Bias for Forward-Facing  
493 Motion. *Psychol Sci* *3*, 362–367. 10.1111/j.1467-9280.1992.tb00048.x.
- 494 22. Hubbard, T.L. (1990). Cognitive representation of linear motion: Possible direction and  
495 gravity effects in judged displacement. *Memory & Cognition* *18*, 299–309.  
496 10.3758/BF03213883.
- 497 23. Hubbard, T.L. (2020). Representational gravity: Empirical findings and theoretical  
498 implications. *Psychon Bull Rev* *27*, 36–55. 10.3758/s13423-019-01660-3.
- 499 24. Hafri, A., Boger, T., and Firestone, C. (2022). Melting Ice With Your Mind: Representational  
500 Momentum for Physical States. *Psychol Sci* *33*, 725–735. 10.1177/09567976211051744.
- 501 25. Parsons, L.M. (1987). Imagined spatial transformations of one's hands and feet. *Cognitive*  
502 *Psychology* *19*, 178–241. 10.1016/0010-0285(87)90011-9.
- 503 26. Shiffrar, M., and Freyd, J.J. (1990). Apparent Motion of the Human Body. *Psychol Sci* *1*,  
504 257–264. 10.1111/j.1467-9280.1990.tb00210.x.
- 505 27. Vandenberghe, A., and Vannuscorps, G. (2023). Predictive extrapolation of observed body  
506 movements is tuned by knowledge of the body biomechanics. *Journal of Experimental*  
507 *Psychology: Human Perception and Performance* *49*, 188–196. 10.1037/xhp0001077.
- 508 28. Bonnet, C., Paulos, C., and Nithart, C. (2005). Visual Representations of Dynamic Actions  
509 from Static Pictures. *Perception* *34*, 835–846. 10.1068/p5039.
- 510 29. Jörges, B., and López-Moliner, J. (2017). Gravity as a Strong Prior: Implications for  
511 Perception and Action. *Frontiers in Human Neuroscience* *11*.

- 512 30. Bertamini, M. (1993). Memory for position and dynamic representations. *Memory &*  
513 *Cognition* *21*, 449–457. [10.3758/BF03197176](https://doi.org/10.3758/BF03197176).
- 514 31. Freyd, J.J. (1983). Representing the dynamics of a static form. *Mem Cogn* *11*, 342–346.  
515 [10.3758/BF03202447](https://doi.org/10.3758/BF03202447).
- 516 32. American Academy of Orthopaedic Surgeons. (1965). Joint motion: method of measuring  
517 and recording. (American Academy of Orthopaedic Surgeons).
- 518 33. Norkin, C.C., and White, D.J. (2016). Measurement Of Joint Motion: A Guide To  
519 Goniometry (F.A. Davis).
- 520 34. Brandman, T., and Yovel, G. (2016). Bodies are Represented as Wholes Rather Than Their  
521 Sum of Parts in the Occipital-Temporal Cortex. *Cerebral Cortex* *26*, 530–543.  
522 [10.1093/cercor/bhu205](https://doi.org/10.1093/cercor/bhu205).
- 523 35. Knill, D.C., and Pouget, A. (2004). The Bayesian brain: the role of uncertainty in neural  
524 coding and computation. *Trends in Neurosciences* *27*, 712–719.  
525 [10.1016/j.tins.2004.10.007](https://doi.org/10.1016/j.tins.2004.10.007).
- 526 36. Wilson, M., and Knoblich, G. (2005). The Case for Motor Involvement in Perceiving  
527 Conspecifics. *Psychological Bulletin* *131*, 460–473. [10.1037/0033-2909.131.3.460](https://doi.org/10.1037/0033-2909.131.3.460).
- 528 37. Wilson, M., Lancaster, J., and Emmorey, K. (2010). Representational momentum for the  
529 human body: Awkwardness matters, experience does not. *Cognition* *116*, 242–250.  
530 [10.1016/j.cognition.2010.05.006](https://doi.org/10.1016/j.cognition.2010.05.006).
- 531 38. Buccino, G., Binkofski, F., and Riggio, L. (2004). The mirror neuron system and action  
532 recognition. *Brain Lang* *89*, 370–376. [10.1016/S0093-934X\(03\)00356-0](https://doi.org/10.1016/S0093-934X(03)00356-0).
- 533 39. Rizzolatti, G., and Craighero, L. (2004). THE MIRROR-NEURON SYSTEM. *Annu. Rev.*  
534 *Neurosci.* *27*, 169–192. [10.1146/annurev.neuro.27.070203.144230](https://doi.org/10.1146/annurev.neuro.27.070203.144230).
- 535 40. Vannuscorps, G., Pillon, A., and Andres, M. (2012). Effect of biomechanical constraints in  
536 the hand laterality judgment task: where does it come from? *Front. Hum. Neurosci.* *6*.  
537 [10.3389/fnhum.2012.00299](https://doi.org/10.3389/fnhum.2012.00299).
- 538 41. Vannuscorps, G., and Caramazza, A. (2016). Typical action perception and interpretation  
539 without motor simulation. *Proc. Natl. Acad. Sci. U.S.A.* *113*, 86–91.  
540 [10.1073/pnas.1516978112](https://doi.org/10.1073/pnas.1516978112).
- 541 42. Romano, D., Marini, F., and Maravita, A. (2017). Standard body-space relationships:  
542 Fingers hold spatial information. *Cognition* *165*, 105–112.  
543 [10.1016/j.cognition.2017.05.014](https://doi.org/10.1016/j.cognition.2017.05.014).
- 544 43. Romano, D., Mioli, A., D'Alonzo, M., Maravita, A., Di Lazzaro, V., and Di Pino, G. (2021).  
545 Behavioral and Physiological Evidence of a favored Hand Posture in the Body

- 546 Representation for Action. *Cerebral Cortex* *31*, 3299–3310. 10.1093/cercor/bhab011.
- 547 44. Zapparoli, L., Saetta, G., De Santis, C., Gandola, M., Zerbi, A., Banfi, G., and Paulesu, E.  
548 (2016). When I am (almost) 64: The effect of normal ageing on implicit motor imagery in  
549 young elderly. *Behavioural Brain Research* *303*, 137–151. 10.1016/j.bbr.2016.01.058.
- 550 45. Scarpina, F., Paschino, C., Scacchi, M., Mauro, A., and Sedda, A. (2022). Does physical  
551 weight alter the mental representation of the body? Evidence from motor imagery in  
552 obesity. *Q J Exp Psychol (Hove)* *75*, 2349–2365. 10.1177/17470218221075038.
- 553 46. Filbrich, L., Verfaillie, C., Vannuscorps, G., Berquin, A., Barbier, O., Libouton, X., Fraselle, V.,  
554 Mouraux, D., and Legrain, V. (2023). Atypical influence of biomechanical knowledge in  
555 Complex Regional Pain Syndrome-towards a different perspective on body  
556 representation. *Sci Rep* *13*, 520. 10.1038/s41598-023-27733-x.
- 557 47. Moseley, G.L., Zalucki, N., Birklein, F., Marinus, J., van Hilten, J.J., and Luomajoki, H. (2008).  
558 Thinking about movement hurts: The effect of motor imagery on pain and swelling in  
559 people with chronic arm pain. *Arthritis Care & Research* *59*, 623–631. 10.1002/art.23580.
- 560 48. Peelen, M.V., and Downing, P.E. (2005). Selectivity for the Human Body in the Fusiform  
561 Gyrus. *Journal of Neurophysiology* *93*, 603–608. 10.1152/jn.00513.2004.
- 562 49. Schwarzlose, R.F., Baker, C.I., and Kanwisher, N. (2005). Separate Face and Body Selectivity  
563 on the Fusiform Gyrus. *J. Neurosci.* *25*, 11055–11059. 10.1523/JNEUROSCI.2621-05.2005.
- 564 50. Kanwisher, N., McDermott, J., and Chun, M.M. (1997). The Fusiform Face Area: A Module  
565 in Human Extrastriate Cortex Specialized for Face Perception. *J. Neurosci.* *17*, 4302–4311.  
566 10.1523/JNEUROSCI.17-11-04302.1997.
- 567 51. Downing, P.E., and Peelen, M.V. (2011). The role of occipitotemporal body-selective  
568 regions in person perception. *Cognitive Neuroscience* *2*, 186–203.  
569 10.1080/17588928.2011.582945.
- 570 52. Leopold, D.A., O'Toole, A.J., Vetter, T., and Blanz, V. (2001). Prototype-referenced shape  
571 encoding revealed by high-level aftereffects. *Nat Neurosci* *4*, 89–94. 10.1038/82947.
- 572 53. Loffler, G., Yourganov, G., Wilkinson, F., and Wilson, H.R. (2005). fMRI evidence for the  
573 neural representation of faces. *Nat Neurosci* *8*, 1386–1391. 10.1038/nn1538.
- 574 54. Chan, A.W.-Y., Kravitz, D.J., Truong, S., Arizpe, J., and Baker, C.I. (2010). Cortical  
575 representations of bodies and faces are strongest in commonly experienced  
576 configurations. *Nat Neurosci* *13*, 417–418. 10.1038/nn.2502.
- 577 55. Quadflieg, S., and Koldewyn, K. (2017). The neuroscience of people watching: how the  
578 human brain makes sense of other people's encounters. *Annals of the New York Academy*  
579 *of Sciences* *1396*, 166–182. 10.1111/nyas.13331.

- 580 56. Brysbaert, M. (2019). How many participants do we have to include in properly powered  
581 experiments? A tutorial of power analysis with reference tables. *Journal of Cognition* *2*,  
582 16. 10.5334/joc.72.
- 583 57. de Leeuw, J.R. (2015). jsPsych: A JavaScript library for creating behavioral experiments in  
584 a Web browser. *Behav Res* *47*, 1–12. 10.3758/s13428-014-0458-y.
- 585 58. Kuroki, D. (2021). A new jsPsych plugin for psychophysics, providing accurate display  
586 duration and stimulus onset asynchrony. *Behav Res* *53*, 301–310. 10.3758/s13428-020-  
587 01445-w.
- 588 59. Makowski, D. (2018). The psycho Package: an Efficient and Publishing-Oriented Workflow  
589 for Psychological Science. *Journal of Open Source Software* *3*, 470. 10.21105/joss.00470.
- 590 60. R Core Team (2021). R: A language and environment for statistical computing. R  
591 Foundation for Statistical Computing, Vienna, Austria. URL <https://www.R-project.org/>.
- 592
- 593 61. Schmalz, X., Biurrun Manresa, J., and Zhang, L. (2021). What is a Bayes factor?  
594 *Psychological Methods* *28*. 10.1037/met0000421.

595

596
